# Supplementary material
Source: HighWire-hosted journal article supplement (doi:10.1101/rna.079695.123)
Supplement: Supplemental_Legends.docx [file Supplemental_Legends.docx]

**SUPPLEMENTAL LEGENDS**

**FIGURE S1.** -MAT reporters reflect RNA endogenous localization and show wide dynamic range of protein expression in response to SAM. (A) Nuclear (N) and cytoplasmic (C) RNA from cells transfected with the indicated reporter was analyzed by northern blot. The samples were run in duplicate. One membrane was probed with β-globin followed by cytoplasmic control GAPDH, and the other was probed for MAT2A followed by the nuclear control MALAT1. The data show that the retained intron isoforms are predominantly nuclear while the mRNAs are predominantly cytoplasmic. DI and m mark the detained intron or mRNA isoforms, respectively; the asterisk marks the position of the unspliced β-globin intron transcript (only visible in the β-MAT ΔDI reporters). (B) Quantification of the protein expression from each reporter in response to the MAT2A inhibitor AGI-24512. The treated-to-untreated ratios of protein expression using are plotted for each sample. The β-MAT-hp1 results were not included because the uninduced samples had too low of a signal-to-noise ratio to be a reliable denominator. Similarly, the low values for the uninduced β-MAT-WT resulted in the large error bars and lack of statistical significance when compared to other reporters. Nonetheless, it seems likely that the larger fold induction for the WT is biologically relevant as the replicate with the lowest fold induction in the wild-type (~10-fold) is higher than the highest value for any other sample. The data are represented as mean ± standard deviation (SD) and the p-values shown above each bar are from a two-tailed, unpaired Student’s t-test comparing each value to wild-type control, β-MAT-WT.

**FIGURE S2.** NUDT21 does not bind to the UGUA in the detained intron. (*A*) Diagram showing the UGUA and UGUU in the detained intron (purple) and 3´ UTR (orange), respectively. Previous studies suggested that these two NUDT21 binding sites may be important for MAT2A detained intron splicing. (*B*) In vitro crosslinking assay with recombinant NUDT21 and 32P-end-labeled 21-mer RNA substrate centered on the UGUA or UGUU element in the detained intron or 3´ UTR as indicated. The top panel is the phosphorimage of the SDS page and the bottom is a western blot. These data show efficient binding of rNUDT21 to UGUU or UGUA mutation in the 3´ UTR substrate, but not its UGCU counterpart. The UGUA in the intron is a comparatively weaker binding substrate that becomes even weaker upon mutation to UAUA. (*C*) To understand why this short RNA with a consensus NUDT21 binding site did not efficiently bind NUDT21, we performed swaps with the adjacent sequences from the 3´ UTR and detained intron. Diagrams are on the right; orange is 3´ UTR sequence with the UGUU mutated to UGUA for consistency within the detained intron substrates. The purple represents the detained intron sequence. The UGCA is a negative control. Interestingly, inclusion of the 9 nt immediately upstream of the UGUA in the detained intron decreased binding of the UGUA within the 3´ UTR context. Conversely, inclusion of the upstream 9 nt from the 3´UTR increased NUDT21 binding to the detained intron substrate construct. We conclude that the sequence immediately upstream of the UGUA element in the detained intron negatively affects NUDT21 binding, perhaps by forming structures blocking access to the consensus site.

**SUPPLEMENTARY TABLE S1**. Reagents used in this study including cell lines, plasmids, antibodies, RNA sequences, and DNA oligonucleotide sequences.
