# Supplementary material
Source: HighWire-hosted journal article supplement (doi:10.1101/rna.079695.123)
Supplement: Supplemental_Table_S1.docx [file Supplemental_Table_S1.docx]

| **Reagent** | **Source or sequence** | **Additional Information** |
| --- | --- | --- |
| ***Cell Lines*** | | |
| HEK293 | ATCC |  |
| 293A-TOA | Sahin et al, 2011 |  |
| HCT116 | ATCC |  |
| 116-ΔDI | Scarborough et al. 2021 |  |
| ***Plasmids*** | | |
| bD1,2 (B-A) | Conrad et al. 2006 | Digest with NcoI for β-globin northern probe templates |
| pcEGFP-stop | This paper | Loading/co-transfection control |
| pcDNA3 | Clontech |  |
| β-MAT-WT | Pendleton et al. 2017 |  |
| β-MAT-mhp1 | Pendleton et al. 2017 |  |
| β-MAT-mhp2-6 | Pendleton et al. 2017 |  |
| β-MAT-mhp1-6 | Pendleton et al. 2017 |  |
| β-MAT-DI-UGCA | Scarborough et al. 2021 |  |
| β-MAT-DI-CGUA | Scarborough et al. 2021 |  |
| β-MAT-DI-UUUA | This paper |  |
| β-MAT-DI-UGUC | This paper |  |
| β-MAT-DI-UGUU | This paper |  |
| β-MAT-DI-AGUA | This paper |  |
| β-MAT-DI-GGUA | This paper |  |
| β-MAT-DI-UGAA | This paper |  |
| β-MAT-DI-UGGA | This paper |  |
| β-MAT-DI-UAUA | This paper |  |
| β-MAT-DI-UGUG | This paper |  |
| β-MAT-DI-UCUA | This paper |  |
| ***Antibodies*** | | |
| METTL16 | Sigma HPA020352 | 1:1000 |
| PABPN1 | Abcam ab75855 | 1:1000 |
| NUDT21 | Invitrogen #702871 | 1:1000 |
| GFP | Abcam ab6556 | 1:2000 |
| Flag | Sigma F7425 | 1:5000 |
| Rabbit IgG | IRDye #926-32211 or #926-68070 | 1:20000 |
| ***RNA Substrates*** | | |
| UTR-WT | UAUUGAAAGUGUUAGCCUUUU |  |
| UTR-UGUA | UAUUGAAAGUGUAAGCCUUUU |  |
| UTR-UGCU | UAUUGAAAGUGCUAGCCUUUU |  |
| DI-WT | UUACGGACUUGUAUAUUCCAG |  |
| DI-UGUU | UUACGGACUUGUUUAUUCCAG |  |
| DI-UAUA | UUACGGACUUAUAUAUUCCAG |  |
| DI-UTR | UUACGGACUUGUAAGCCUUUU |  |
| UTR-DI | UAUUGAAAGUGUAUAUUCCAG |  |
| ***Primers*** | | |
| NC2909 | ACCACATGAAGCAGCACGAC | GFP northern probe template |
| NC4001 | TAATACGACTCACTATAGGGATCTTGAAGTTCACCTTGATG | GFP northern probe template (with T7 promoter) |
| NC1549 | CCTGCCGTCTAGAAAAACCTG | GAPDH northern probe template |
| NC1550 | CGCGTAATACGACTCACTATAGGGGGTTGAGCACAGGGTACTTTA | GAPDH northern probe template (with T7 promoter) |
| NC897 | CCCAAATCTCAAGCGGTGCTT | MALAT1 northern probe template |
| NC898 | CGCGTAATACGACTCACTATAGGGAAGCTAGAAAAAGGCCAAAAAGC | MALAT1 northern probe template (with T7 promoter) |
| NC964 | ATGAACGGACAGCTCAACGGC | MAT2A northern probe template |
| NC965 | TAATACGACTCACTATAGGGACTTGGCTGTAGGTGGTAGAT | MAT2A northern probe template (with T7 promoter) |
| NC3315 | AGCTTATGAAGTAACGGCCG | pcEGFP-stop |
| NC3316 | GATCCGGCCGTTACTTCATA | pcEGFP-stop |
| NC1145 | ACCTACGAATTCGTCTCTTATGCTATTGGAGTTTC | ΔDI constructs |
| SP6+ | GCTCTAGCATTTAGGTGACACTATAG | ΔDI constructs |
| NC3339 | GGCCCATCACTTTGGCAAAGAATTCGTCTCTTATGCTATTGGAGTTTCTC | Forward primer for Gibson fragment generation of DI UGUA mutants |
| NC3346 | GACACTATAGAATAGGGCCCTCGAGATAGCGGCCGCCTTGGTAC | Reverse primer for Gibson fragment generation of DI UGUA mutants |
| *Primers used to make specific PPT mutations:* | | |
| NC4265 | GCTACATATTAAGTTACGGACTTCTATATTCCAGGG | UCUA |
| NC4266 | CTTCTTCAGATCCAGATCCCTGGAATATAGAAGTCC | UCUA |
| NC4304 | GCTACATATTAAGTTAC GGACTTTTATATTCCAGGG | UUUA |
| NC4305 | CTTCTTCAGATCCAGATCCCTGGAATATAAAAGTCC | UUUA |
| NC4310 | GCTACATATTAAGTTACGGACTTGTCTATTCCAGGG | UGUC |
| NC4311 | CTTCTTCAGATCCAGATCCCTGGAATAGACAAGTCC | UGUC |
| NC4263 | CATATTAAGTTACGGACTTGTTTATTCCAGGGATCTGGATCTG | UGUU |
| NC4264 | CAGATCCCTGGAATAAACAAGTCCGTAACTTAATATG | UGUU |
| NC4300 | GCTACATATTAAGTTACGGACTAGTATATTCCAGGG | AGUA |
| NC4301 | CTTCTTCAGATCCAGATCCCTGGAATATACTAGTCC | AGUA |
| NC4302 | GCTACATATTAAGTTACGGACTGGTATATTCCAGGG | GGUA |
| NC4303 | CTTCTTCAGATCCAGATCCCTGGAATATACCAGTCC | GGUA |
| NC4306 | GCTACATATTAAGTTACGGACTTGAATATTCCAGGG | UGAA |
| NC4307 | CTTCTTCAGATCCAGATCCCTGGAATATTCAAGTCC | UGAA |
| NC4308 | GCTACATATTAAGTTACGGACTTGGATATTCCAGGG | UGGA |
| NC4309 | CTTCTTCAGATCCAGATCCCTGGAATATCCAAGTCC | UGGA |
| NC4269 | GCTACATATTAAGTTAC GGACTTATATATTCCAGGG | UAUA |
| NC4270 | CTTCTTCAGATCCAGATCCCTGGAATATATAAGTCC | UAUA |
| NC4312 | GCTACATATTAAGTTACGGACTTGTGTATTCCAGGG | UGUG |
| NC4313 | CTTCTTCAGATCCAGATCCCTGGAATACACAAGTCC | UGUG |
| NC4417 | GCTACATATTAAGTTACGGACTTGTTTTTTCCAGGG | UGUUUU |
| NC4418 | CTTCAGATCCAGATCCCTGGAAAAAACAAGTCC | UGUUUU |
